# Supplementary material
Source: publisher site journal article supplement (https://www.dovepress.com/article/291050)
Supplement: Supplementary file 1 [file get_supplementary_file.php]

# S1. HERQA Standards of educational resources for pre-service anesthesia training programmes in Ethiopia

| **Area** | **Standards** | **Target** |
| --- | --- | --- |
| **Lecture halls / Classrooms** | **The anaesthesia school MUST have:** | |
| Lecture halls/classrooms for group, tutorial, and seminar activities with adequate space (1.4 m2/student for group/tutorial and 1.6 m2 / student for seminar) | 100% |
| Sufficient and comfortable chairs and tables (moveable armchairs and/or chairs with tables) | 100% |
| Clean projection wall / screen | 100% |
| Writing board with different colours of markers and board cleaner | 100% |
| Ensured rooms are well-illuminated (words can be read in any corner of the room, and screen-projected words, pictures, and videos can be seen clearly without reflection from every corner) | 100% |
| Ensured that the rooms have adequate ventilation (open windows and / or AC, fans) | 100% |
| Functional toilets separate for males and females near the classroom | 100% |
| A regular cleaning schedule and follow-up for the facility | 100% |
| A built-in overhead projector and/or LCD (liquid crystal display) with computer | 100% |
| A water source around/near the classroom | 100% |
| **The anaesthesia school SHOULD have:** | |
| A “smart classroom” | 90% |
| Regular/scheduled facility inspection and maintenance services | 90% |
| **Office for Staff** | **The anaesthesia school MUST have:** | |
| A school dean/ head have office equipped with:  Printer, scanner, photocopy machine, and duplicating machine  Fax machine and telephone  Conference (meeting) table with chairs | 100%  100%  100% |
| An office for teaching and administration staff with adequate space (2.0 m2/person) | 100% |
| Computers with internet access for each member of teaching staff | 100% |
| Chairs and tables with drawers | 100% |
| Filing cabinet and bookshelf | 100% |
| Nearby toilets, separate for males and females (1 toilet for 20 instructors) | 100% |
| **The anaesthesia school SHOULD have:** | |
| A regular maintenance schedule for office equipment | 90% |
| **Skill development center / laboratory** | **The anaesthesia school MUST have:** | |
| A skills development center/laboratory to practice relevant biomedical experiments, airway management, regional and general anesthesia, pain management, basic and advanced cardiac life support (child and adult), and monitoring of patient parameters | 100% |
| Ensured a learning environment that is safe for staff, students, patients, and is relevant to their future careers | 100% |
| Adequate space for skill demonstration, practice, and discussion (2.2 m2/student) | 100% |
| An adequate supply of functional laboratory equipment to learn essential competencies (with the ratio of one piece of equipment for six students in each lab session) | 100% |
| Adequate supplies and chemicals as listed in the respective lab manuals | 100% |
| A dedicated office | 100% |
| Safety manuals, posted safety precautions, a fire extinguisher, an emergency shower, and infection prevention equipment | 100% |
| Uninterrupted water and power supply for each bench | 100% |
| An adequate number of moveable chairs, tables for each station, a labeled shelf with locks, dustbins in all the stations, and storage | 100% |
| Audiovisual aids including video sets | 100% |
| Adequate illumination and ventilation | 100% |
| Adequate and up-to-date learning materials (reference books, checklists for all skills, standard operating procedures [SOPs], wall charts, posters, flow charts, and electronic learning resources) | 100% |
| A regular cleaning schedule and follow-up for the facility | 100% |
| **The anaesthesia school SHOULD:** |  |
| Ensure that the skills lab is properly organised, and managed by a dedicated skills lab manager | 90% |
| Be accessible for students’ independent practice | 90% |
| Have a system for tracking all materials and equipment after each practice | 90% |
| Have a central research lab (core lab) where the staff and students undertake anesthesia research activities | 90% |
| Have a facility to house animals for the courses offered by the program and for research | 90% |
| Have a regular maintenance schedule for the laboratory facility and equipment | 90% |
| Have a regular maintenance schedule for the laboratory facility and equipment | 90% |
| **Clinical practice site** | **The anaesthesia school MUST:** |  |
| Have an adequate client caseload and case mix as per the core competencies | 100% |
| Have sufficient staff who are willing to be preceptors | 100% |
| Have a range of clinical practice sites (primary, secondary, tertiary levels) and specialised research centers | 100% |
| Have a practice standard of practical training facilities that matches what is taught in the school | 100% |
| Have a sufficient number and variety of practicum sites for mandatory and elective anaesthesia practice experiences, including sites for practice in:  Preoperative anaesthetic assessment  Anaesthesia induction  Airway management  Pain management  Intraoperative maintenance of anaesthesia  Monitoring of anesthetised patients  Emergence of anaesthesia care  Critical care services  Checking and maintenance of anaesthesia equipment  Resuscitation of a cardiac arrest patient | 100%  100%  100%  100%  100%  100%  100%  100%  100%  100% 100% |
| Ensure the availability of necessary resources for giving the students adequate clinical experience, including national service delivery guidelines, personal protective equipment, learning tools (checklists, log books, SOPs), and other essential equipment | 100% |
| Ensure easy accessibility of clinical practice sites including transport facilities to distant sites | 100% |
| **The anaesthesia school SHOULD:** | |
| Periodically assess the quality of sites and preceptors in light of achieving curricular needs and identify potential additional sites when needed. | 90% |
| Discontinue relationships with the sites that do not maintain the preset quality criteria and are unable to do so after implementation of a remediation plan | 90% |
| Ensure that the clinical practice sites have discussion rooms | 90% |
| Ensure that the clinical practice sites have a mini-library with essential reference books and guidelines | 90% |
| Use accredited clinical practice sites | 90% |
| **IT facilities** | **The anaesthesia school MUST:** | |
| Ensure students have access to computers with internet connectivity (one computer for three students) | 100% |
| Have electronic educational resources available | 100% |
| Formulate and implement a policy that addresses effective use and evaluation of appropriate information and communication technology for education | 100% |
| **The anaesthesia school SHOULD:** |  |
| Have subscriptions to educational websites/resources for staff and students’ use | 90% |
| Ensure that the IT center is accessible for student independent learning (outside of working hours) | 90% |
| Have regular/scheduled IT facility inspection and maintenance services | 90% |
| **Library** | **The anaesthesia school MUST have:** | |
| Access to a library with:  A qualified librarian, an assistant, catalogue clerks, and other subordinates  A seating capacity to accommodate 25% of the total number of students at a time  A separate reading room for instructors  A catalogue system  Adequate illumination and ventilation, and be free from sound pollution  A nearby functional toilet with a water supply  Signs posted for appropriate behaviors (silence, no food and drinks, no smoking)  A schedule showing library working hours posted at the entry point  An adequate supply of recent textbooks (in a ratio of 1:5 students) and reference materials (a ratio of 1:15 students) relevant to the courses taught  Access to up-to-date and peer-reviewed journals (local and international)  Copies of relevant and updated national service delivery guidelines and protocols on priority health issues in the country | 100%  100%  100%  100%  100%  100%  100%  100%  100%  100%  100% |
| **The anaesthesia school SHOULD have :** | |
| An automated library system (system for recording and cataloging material and for ensuring the security of materials) | 90% |
| A system to take feedback from users and update its services on a regular basis | 90% |
| 24/7 access to services | 90% |
| **Student amenities** | **The anaesthesia school MUST:** | |
| Have an entity/unit responsible for student support, addressing academic, social, financial, and personal needs | 100% |
| Ensure safe and adequate student facilities including lounges, catering, student housing (if possible), and sports and recreational facilities | 100% |
| Allocate resources (budget, facilities, and qualified personnel) for student support programs | 100% |
| Ensure the availability of a student clinic, counselling, and social support units at institution level | 100% |
| Ensure that different facilities on campus are accessible to students with disabilities | 100% |
| **The anaesthesia school SHOULD have:** | |
| Regular/scheduled facility inspection and maintenance services | 90% |
| A student complex providing a variety of services | 90% |
| **Finance** | **The anaesthesia school MUST:** | |
| Deploy financial resources to:  Support all aspects of the goals and strategic plan and ensure stability in the delivery of the program  Allow effective faculty and support staff recruitment, retention, and development  Maintain and improve physical facilities, equipment, and other educational and research resources  Measure, record, analyse, document, and distribute assessment and evaluation activities  Ensure experiential learning and preceptor support for smooth curriculum implementation | 100%  100%  100%  100%  100% |
| **The anaesthesia school SHOULD:** | |
| Develop and maintain a broad base of financial support, including a program to acquire extracurricular funds through endowment income, consultancy services, grants, provision of continuing education, and other fundraising mechanisms | 90% |
| Secure a budget for innovation in education, research, and other scholarly activities | 90% |
| Allocate an uncommitted reserve of finance/budget to address unexpected issues | 90% |
